# Supplementary material
Source: PubMed Central journal article supplement (PMC2757573)

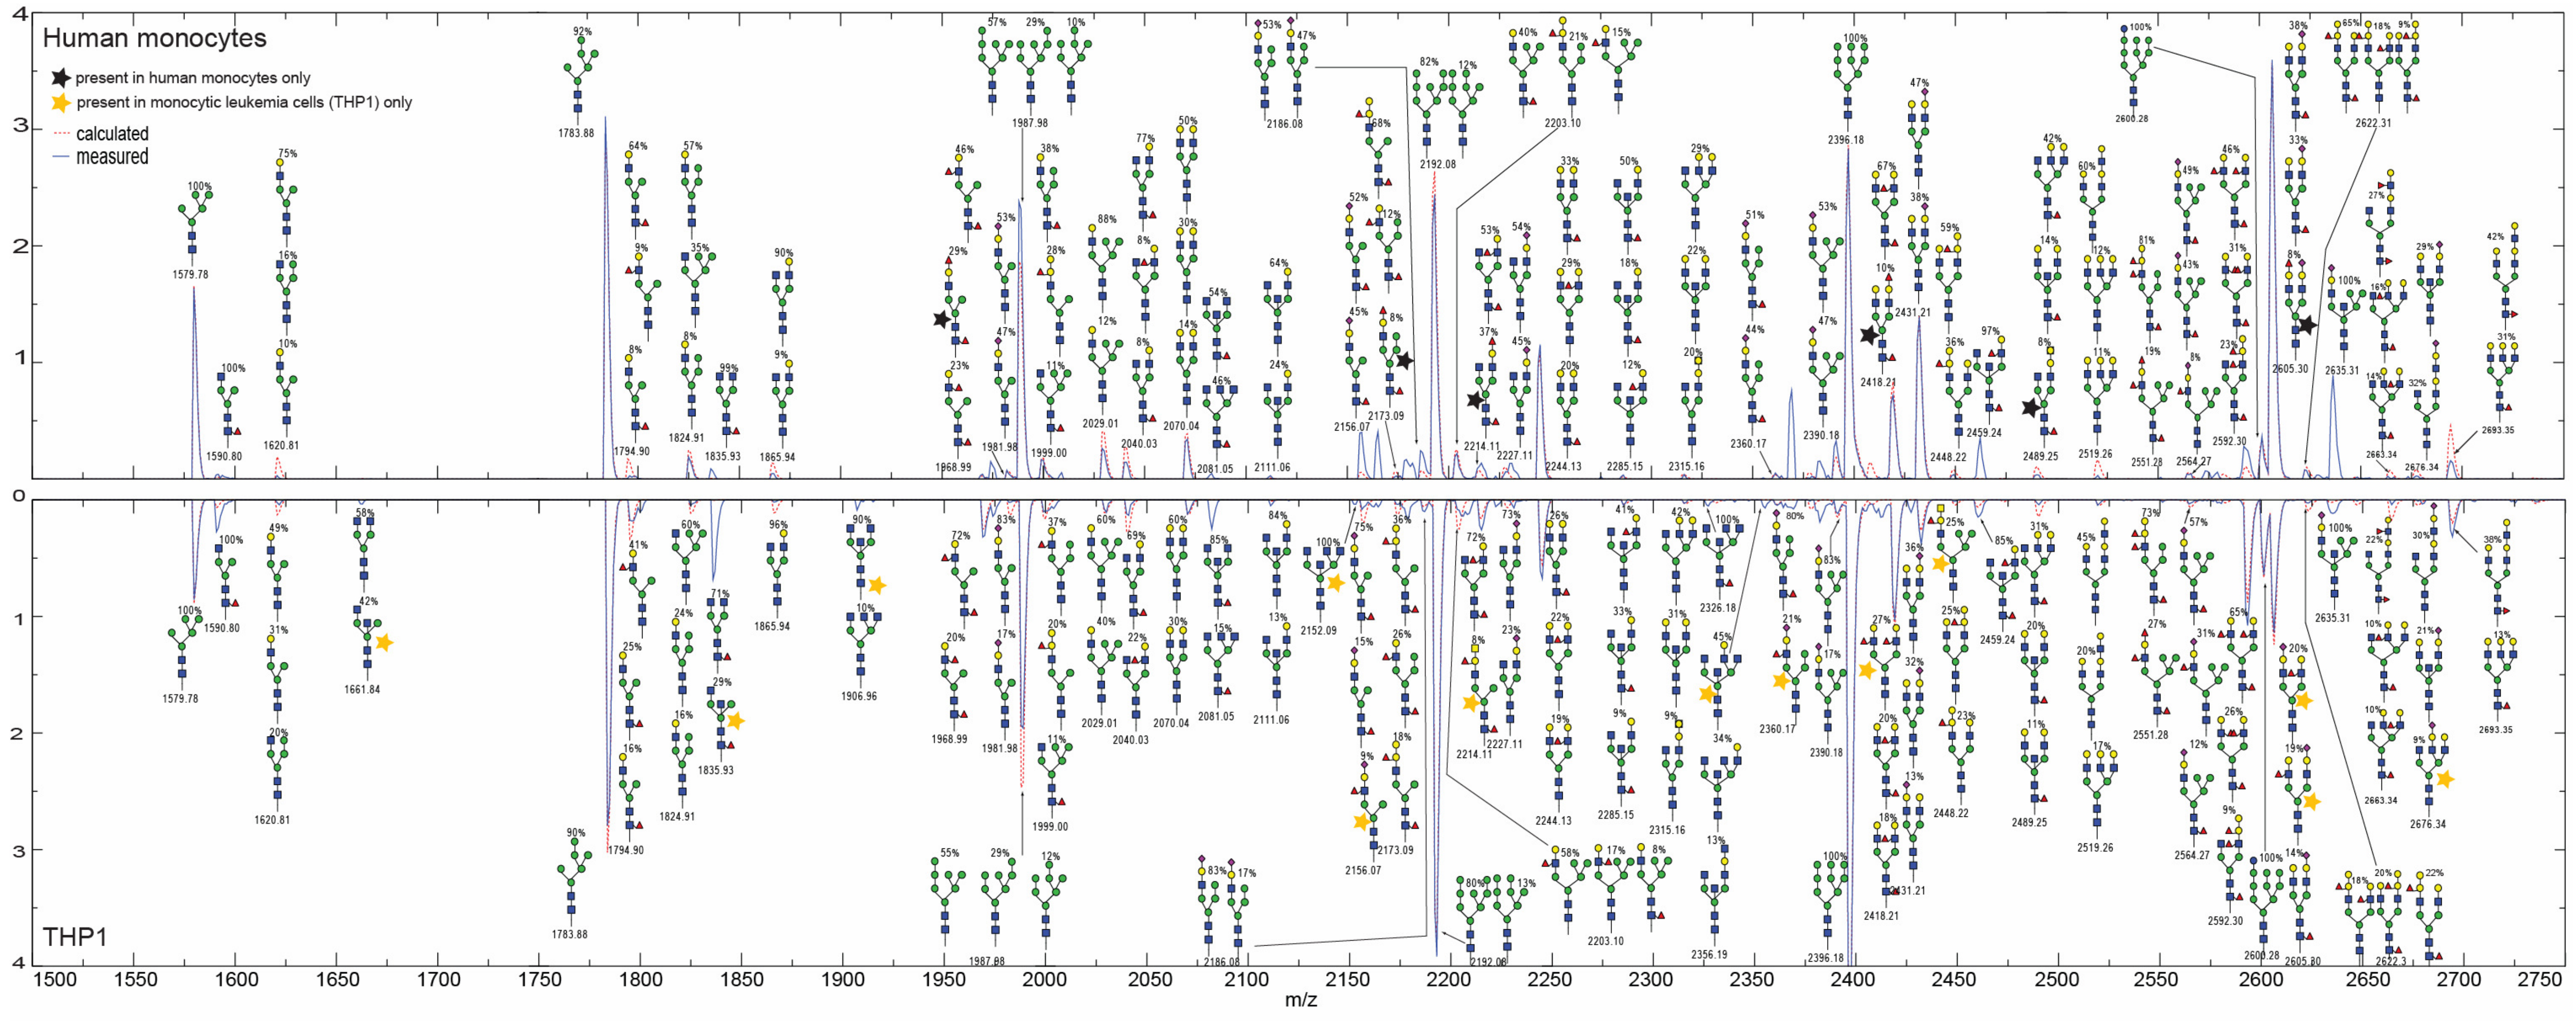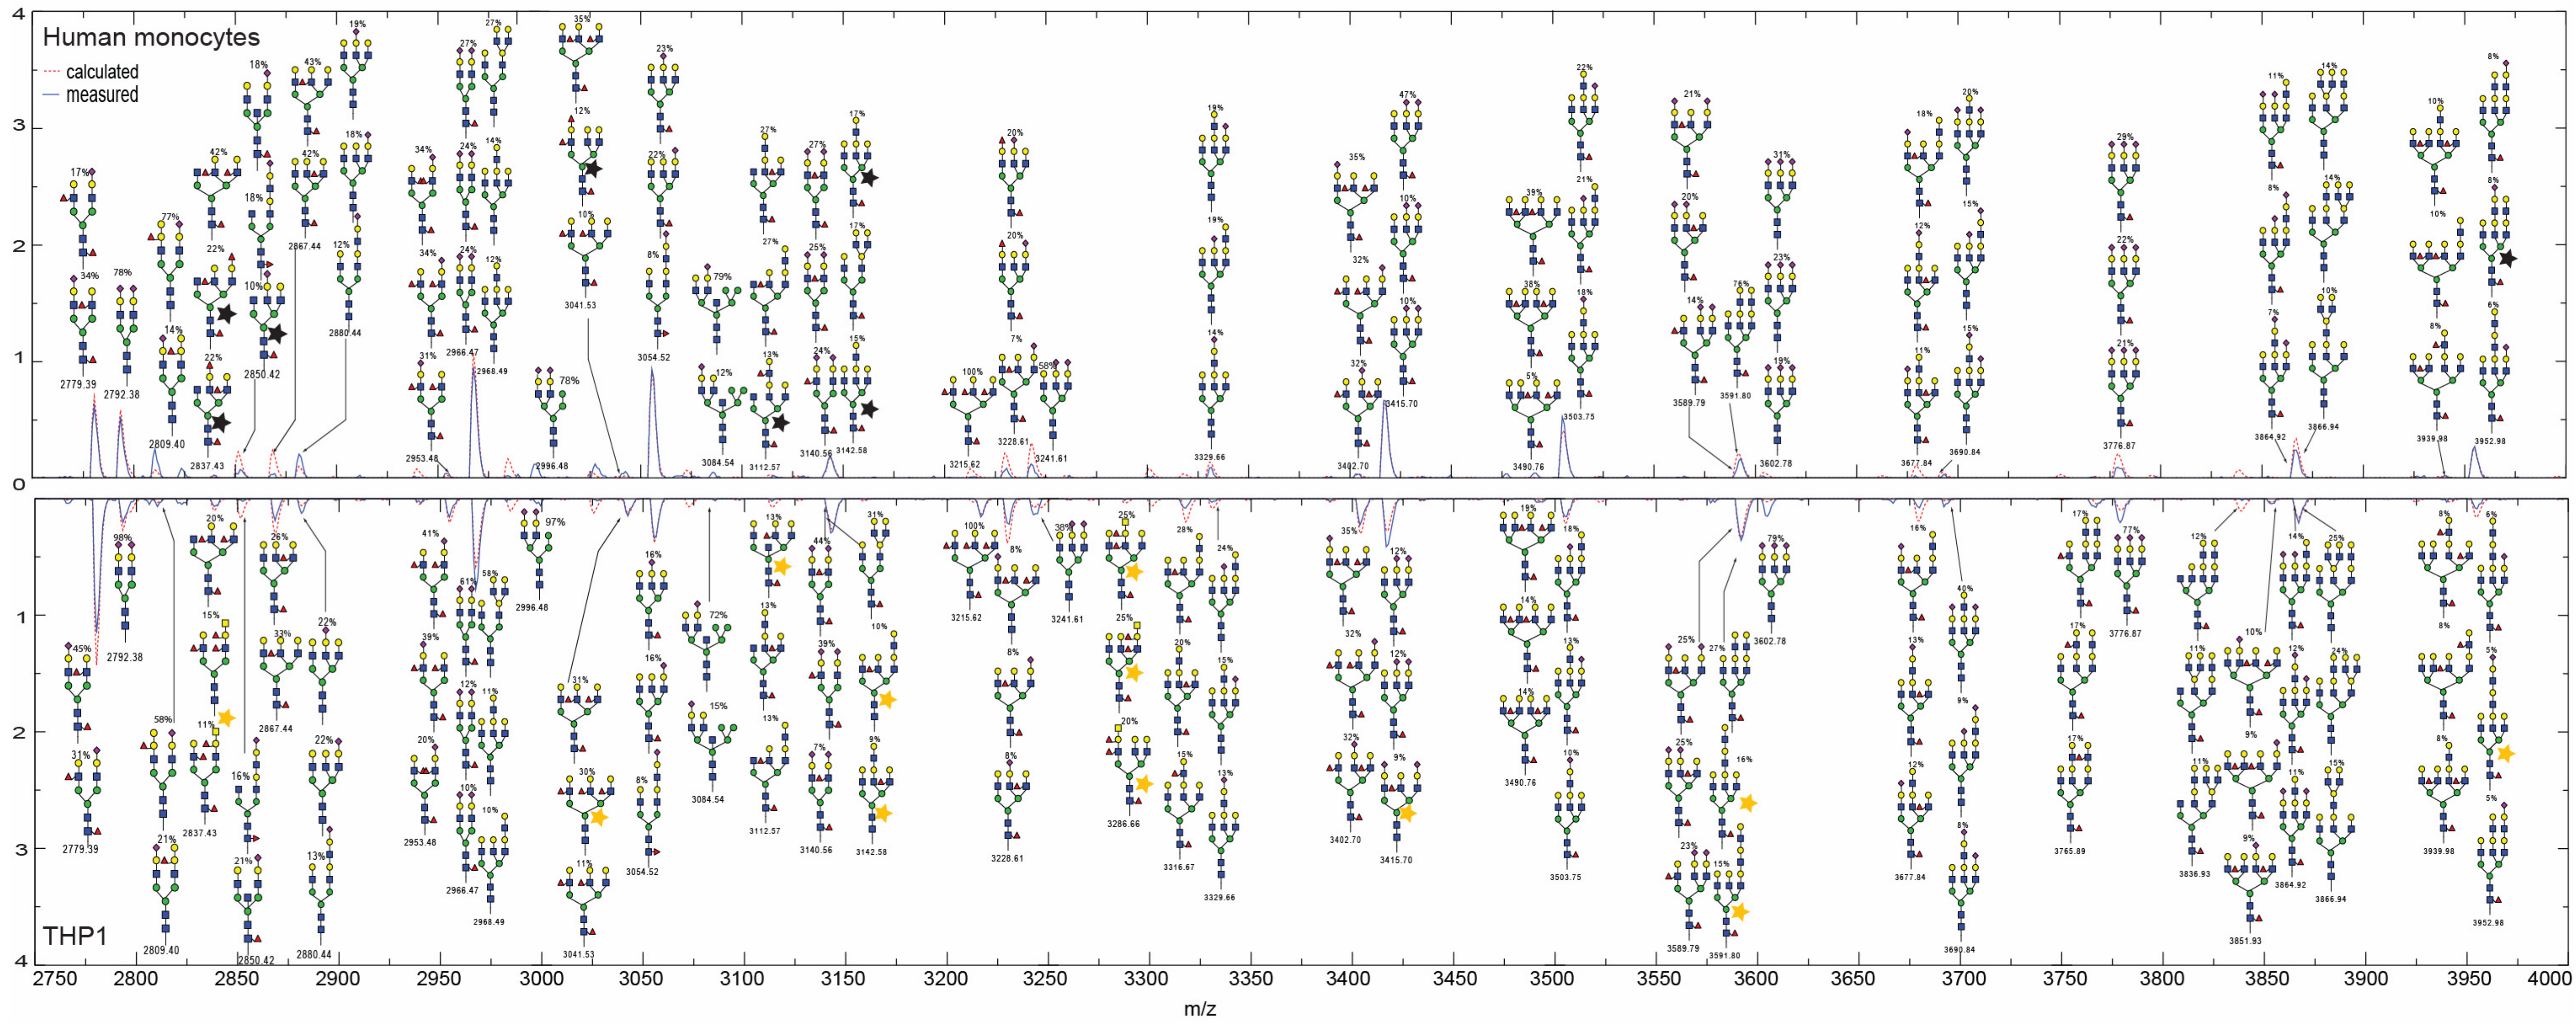

Supplement: cwp081_1.pdf [file cwp081_1.pdf]
